# Supplementary material
Source: PubMed Central journal article supplement (PMC5794226)
Supplement: NIHMS931801-supplement-SupInfo.pdf [file NIHMS931801-supplement-SupInfo.pdf]

**Table S1. Summary of virus titer.** Estimated SMV1 titer in original inoculum and those detected in fecal pellets. Estimates based on qPCR and PFU assays are presented.

| <b>SMV1 conc.*</b>        |            | <b>SMV1 PKH67 conc.*</b>        |            |
|---------------------------|------------|---------------------------------|------------|
| <u>qPCR</u>               | <u>PFU</u> | <u>qPCR</u>                     | <u>PFU</u> |
| 4,9E+11                   | 3,2E+11    | 6,3E+11                         | 4,00E+10   |
| <b>Fecal SMV1 conc.**</b> |            | <b>Fecal SMV1 PKH67 conc.**</b> |            |
| <u>qPCR</u>               | <u>PFU</u> | <u>qPCR</u>                     | <u>PFU</u> |
| 3,9E+11                   | 2,7E+05    | 2,9E+11                         | 4,4E+04    |

\*Total administered conc. measured before administration (qPCR: copy number in 200µl, PFU: plaque forming units in 200µl)

\*\* Estimate based on the following assumptions: Total fecal shedding based on the average viral conc. in the pellets from 1 mouse collected over a 7hr peak period with a stool frequency of 7 pellets/hr for 7hr.

*Example:*  
 $7,9E+9 \text{ avg. copies/pellet} \times 7 \text{ pellets/hr} \times 7\text{hr} = 3,9E+11 \text{ total viral copy number}$

**Table S2. Detection of SMV1 and M13KE DNA in tissues of mice inoculated orally with virus.**

| Tissue    | Perfused |         | Perfused |         |
|-----------|----------|---------|----------|---------|
|           | SMV1     | Control | M13      | Control |
| Brain     | 0/2      | 0/2     | 0/2      | 0/2     |
| Liver     | 0/2      | 0/2     | 0/2      | 0/2     |
| Spleen    | 0/2      | 0/2     | 0/2      | 0/2     |
| Cecum     | 0/2      | 0/2     | 0/2      | 0/2     |
| Cecal tip | 0/2      | 0/2     | 2/2      | 0/2     |
| Serum     | 0/2      | 0/2     | 0/2      | 0/2     |

0/2 indicates no detection of vDNA in either of the two time points; 2/2 shows positive detection of vDNA in both time points.

**Fig. S1**

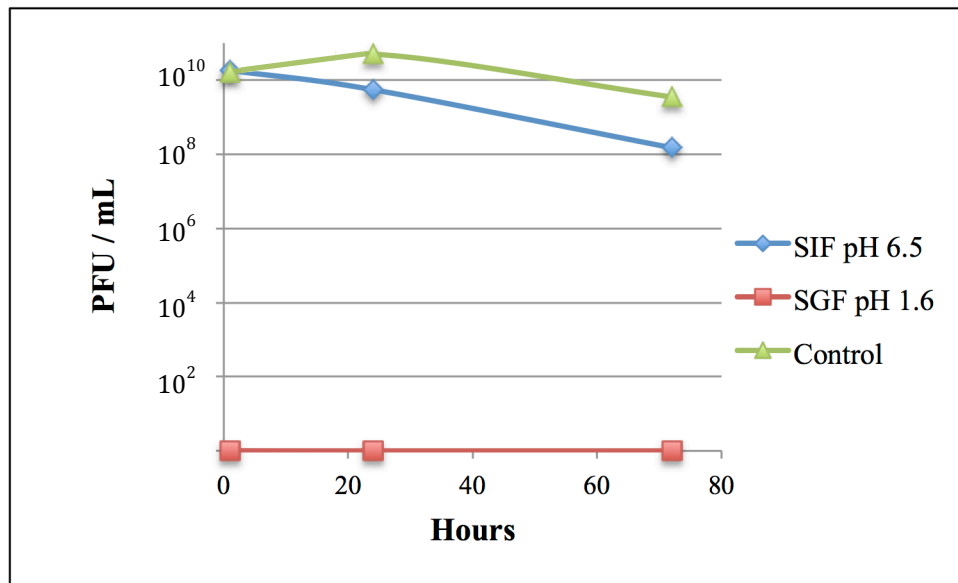

**Fig.S1. Survival of M13KE particles.** The infectivity of M13KE after incubation at 37°C in SIF pH 6.5 and SGF pH 1.6. Incubation in TBS buffer pH 7.5 was monitored as a control. The number of plaque forming units per milliliter (PFU mL<sup>-1</sup>) was determined by plaque assay and is shown as a function of time in hours.

Fig. S2

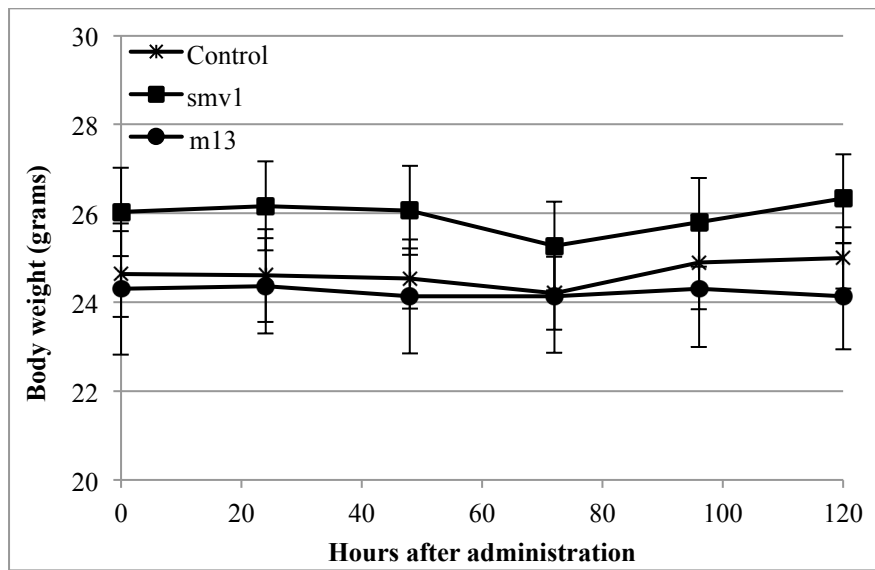

**Fig. S2 Observations of mice body weights.** Body weights were measured daily for 5 days. At the 0 h time-point a one-time administration of either 200  $\mu$ l VLP solution or control Tris-acetate solution was carried out.

Fig. S3

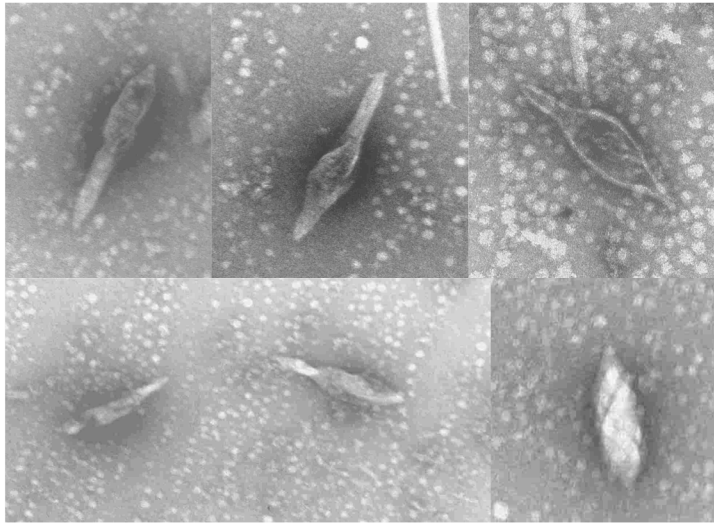

**Fig. S3 TEM images of recovered SMV1 particles from the fecal samples show intact morphology.**
